# Supplementary material for: Changes in Dietary Habits and Exercise Pattern of Korean Adolescents from Prior to during the COVID-19 Pandemic
Source: MDPI journal article supplement (doi:10.3390/nu13103314), 2021-09-23
Supplement: s1 [file s1]

**S1 Table** Odd ratios of dietary habit or exercise pattern in 2020 compared to 2019 in middle school student.

| Dietary habit or PA | Number (%)    |               | OR (95% CI)      |         |                  |         |                  |         |
|---------------------|---------------|---------------|------------------|---------|------------------|---------|------------------|---------|
|                     | 2019          | 2020          | Crude            | P-value | Partial†         | P-value | Full‡            | P-value |
| Breakfast           |               |               |                  | <0.001* |                  | <0.001* |                  | <0.001* |
| 0-1 time/week       | 7,376 (26.9)  | 7,548 (27.4)  | 1.00 (Ref)       |         | 1.00 (Ref)       |         | 1.00 (Ref)       |         |
| 2-4 times/week      | 6,140 (22.4)  | 6,758 (24.5)  | 1.10 (1.04-1.15) |         | 1.28 (1.07-1.19) |         | 1.16 (1.10-1.22) |         |
| ≥ 5 times/week      | 13,938 (50.8) | 13,234 (48.1) | 0.94 (0.90-0.99) |         | 1.05 (1.00-1.11) |         | 1.07 (1.02-1.13) |         |
| Fruit               |               |               |                  | <0.001* |                  | <0.001* |                  | <0.001* |
| 0-2 times/week      | 10,255 (37.4) | 11,373 (41.3) | 1.00 (Ref)       |         | 1.00 (Ref)       |         | 1.00 (Ref)       |         |
| 3-4 times/week      | 7,520 (27.4)  | 7,369 (26.8)  | 0.88 (0.84-0.93) |         | 0.94 (0.89-0.98) |         | 0.95 (0.91-1.00) |         |
| ≥ 5 times/week      | 9,679 (35.3)  | 8,798 (31.9)  | 0.81 (0.77-0.86) |         | 0.90 (0.85-0.95) |         | 0.92 (0.87-0.97) |         |
| Soda drink          |               |               |                  | <0.001* |                  | <0.001* |                  | <0.001* |
| 0-2 times/week      | 17,455 (63.6) | 18,003 (65.4) | 1.00 (Ref)       |         | 1.00 (Ref)       |         | 1.00 (Ref)       |         |
| 3-4 times/week      | 6,324 (23.0)  | 5,834 (21.2)  | 0.89 (0.84-0.94) |         | 0.82 (0.78-0.86) |         | 0.90 (0.86-0.95) |         |
| ≥ 5 times/week      | 3,675 (13.4)  | 3,703 (13.4)  | 0.97 (0.90-1.04) |         | 0.85 (0.80-0.91) |         | 0.96 (0.89-1.02) |         |
| Sweet drink         |               |               |                  | <0.001* |                  | <0.001* |                  | <0.001* |
| 0-2 times/week      | 14,366 (52.3) | 15,829 (57.5) | 1.00 (Ref)       |         | 1.00 (Ref)       |         | 1.00 (Ref)       |         |
| 3-4 times/week      | 7,814 (28.5)  | 6,690 (24.3)  | 0.76 (0.73-0.80) |         | 0.74 (0.70-0.77) |         | 0.77 (0.74-0.81) |         |
| ≥ 5 times/week      | 5,274 (19.2)  | 5,021 (18.2)  | 0.85 (0.80-0.90) |         | 0.77 (0.73-0.82) |         | 0.84 (0.79-0.86) |         |
| Fast food           |               |               |                  | 0.004*  |                  | <0.001* |                  | <0.001* |
| 0-2 times/week      | 20,872 (76.0) | 21,218 (77.0) | 1.00 (Ref)       |         | 1.00 (Ref)       |         | 1.00 (Ref)       |         |
| 3-4 times/week      | 5,171 (18.8)  | 5,026 (18.2)  | 0.94 (0.90-0.99) |         | 0.87 (0.83-0.91) |         | 0.92 (0.88-0.97) |         |
| ≥ 5 times/week      | 1,411 (5.1)   | 1,296 (4.7)   | 0.89 (0.82-0.97) |         | 0.77 (0.71-0.83) |         | 0.84 (0.78-0.92) |         |
| Vigorous PA         |               |               |                  | <0.001* |                  | <0.001* |                  | <0.001* |

|                   |               |               |                  |         |                  |                  |         |
|-------------------|---------------|---------------|------------------|---------|------------------|------------------|---------|
| 0 time/week       | 6,866 (25.0)  | 9,174 (33.3)  | 1.00 (Ref)       |         | 1.00 (Ref)       | 1.00 (Ref)       |         |
| 1-2 times/week    | 9,779 (35.6)  | 9,573 (34.8)  | 0.73 (0.69-0.78) |         | 0.75 (0.71-0.80) | 0.71 (0.68-0.75) |         |
| ≥ 3 times/week    | 10,809 (39.4) | 8,793 (31.9)  | 0.62 (0.57-0.67) |         | 0.63 (0.59-0.67) | 0.54 (0.51-0.58) |         |
| Moderate PA       |               |               |                  | <0.001* |                  | <0.001*          | 0.105   |
| 0 time/week       | 8,613 (31.4)  | 9,657 (35.1)  | 1.00 (Ref)       |         | 1.00 (Ref)       | 1.00 (Ref)       |         |
| 1-2 times/week    | 7,637 (27.8)  | 7,971 (28.9)  | 0.94 (0.89-0.99) |         | 0.97 (0.92-1.02) | 1.05 (1.00-1.11) |         |
| ≥ 3 times/week    | 11,204 (40.8) | 9,912 (36.0)  | 0.80 (0.75-0.85) |         | 0.84 (0.79-0.89) | 1.01 (0.95-1.07) |         |
| Strength Exercise |               |               |                  | <0.001* |                  | <0.001*          | <0.001* |
| 0 time/week       | 13,077 (47.6) | 12,959 (47.1) | 1.00 (Ref)       |         | 1.00 (Ref)       | 1.00 (Ref)       |         |
| 1-2 times/week    | 8,048 (29.3)  | 7,681 (27.9)  | 0.97 (0.91-1.03) |         | 1.04 (0.98-1.10) | 1.19 (1.12-1.26) |         |
| ≥ 3 times/week    | 6,329 (23.1)  | 6,900 (25.1)  | 1.10 (1.01-1.18) |         | 1.18 (1.11-1.26) | 1.54 (1.44-1.65) |         |

\* Multiple logistic regression analysis with complex sampling, Significance at  $P < 0.05$

† Adjusted for age, BMI, sedentary time for study or leisure, sex, economic level, sleep time, subjective health status, subjective body shape image, smoking, and drinking alcohol histories.

‡ Adjusted for partial model plus dietary habit and exercise pattern

**S2 Table** Odd ratios of dietary habit or exercise pattern in 2020 compared to 2019 in high school student.

| Dietary habit or PA | Number (%)    |               | OR (95% CI)      |         |                  |         |                  |         |
|---------------------|---------------|---------------|------------------|---------|------------------|---------|------------------|---------|
|                     | 2019          | 2020          | Crude            | P-value | Partial†         | P-value | Full‡            | P-value |
| Breakfast           |               |               |                  | <0.001* |                  | 0.182   |                  | 0.276   |
| 0-1 time/week       | 7,079 (27.2)  | 7,238 (29.4)  | 1.00 (Ref)       |         | 1.00 (Ref)       |         | 1.00 (Ref)       |         |
| 2-4 times/week      | 6,331 (24.3)  | 6,104 (24.8)  | 0.95 (0.90-1.00) |         | 0.98 (0.93-1.04) |         | 1.00 (0.95-1.05) |         |
| ≥ 5 times/week      | 12,597 (48.4) | 11,257 (45.8) | 0.88 (0.82-0.93) |         | 0.95 (0.89-1.01) |         | 0.96 (0.91-1.02) |         |
| Fruit               |               |               |                  | <0.001* |                  | 0.003*  |                  | 0.025*  |
| 0-2 times/week      | 11,809 (45.4) | 11,961 (48.6) | 1.00 (Ref)       |         | 1.00 (Ref)       |         | 1.00 (Ref)       |         |
| 3-4 times/week      | 7,286 (28.0)  | 6,553 (26.6)  | 0.91 (0.86-0.95) |         | 0.93 (0.89-0.98) |         | 0.95 (0.90-1.00) |         |
| ≥ 5 times/week      | 6,912 (26.6)  | 6,085 (24.7)  | 0.89 (0.83-0.94) |         | 0.92 (0.87-0.97) |         | 0.93 (0.88-0.98) |         |
| Soda drink          |               |               |                  | 0.094   |                  | <0.001* |                  | 0.004*  |
| 0-2 times/week      | 16,473 (63.3) | 15,664 (63.7) | 1.00 (Ref)       |         | 1.00 (Ref)       |         | 1.00 (Ref)       |         |
| 3-4 times/week      | 6,209 (23.9)  | 5,648 (23.0)  | 0.96 (0.90-1.01) |         | 0.91 (0.87-0.96) |         | 0.93 (0.88-0.97) |         |
| ≥ 5 times/week      | 3,325 (12.8)  | 3,287 (13.4)  | 1.01 (0.94-1.09) |         | 0.93 (0.87-0.98) |         | 0.92 (0.86-0.99) |         |
| Sweet drink         |               |               |                  | <0.001* |                  | <0.001* |                  | <0.001* |
| 0-2 times/week      | 12,437 (47.8) | 12,400 (50.4) | 1.00 (Ref)       |         | 1.00 (Ref)       |         | 1.00 (Ref)       |         |
| 3-4 times/week      | 7,793 (30.3)  | 6,660 (27.1)  | 0.84 (0.80-0.88) |         | 0.85 (0.81-0.88) |         | 0.86 (0.83-0.90) |         |
| ≥ 5 times/week      | 5,777 (22.2)  | 5,539 (22.5)  | 0.95 (0.89-1.01) |         | 0.94 (0.89-1.00) |         | 0.98 (0.92-1.04) |         |
| Fast food           |               |               |                  | 0.007*  |                  | 0.004*  |                  | <0.001* |
| 0-2 times/week      | 19,364 (74.5) | 18,045 (73.4) | 1.00 (Ref)       |         | 1.00 (Ref)       |         | 1.00 (Ref)       |         |
| 3-4 times/week      | 5,316 (20.4)  | 5,290 (21.5)  | 1.09 (1.03-1.15) |         | 1.06 (1.01-1.12) |         | 1.10 (1.05-1.17) |         |
| ≥ 5 times/week      | 1,327 (5.1)   | 1,264 (5.1)   | 1.02 (0.94-1.12) |         | 0.91 (0.83-1.00) |         | 0.95 (0.87-1.05) |         |
| Vigorous PA         |               |               |                  | <0.001* |                  | <0.001* |                  | <0.001* |

|                   |               |               |                  |                  |                  |
|-------------------|---------------|---------------|------------------|------------------|------------------|
| 0 time/week       | 9,953 (38.3)  | 10,685 (43.4) | 1.00 (Ref)       | 1.00 (Ref)       | 1.00 (Ref)       |
| 1-2 times/week    | 9,344 (35.9)  | 7,838 (31.9)  | 0.76 (0.71-0.83) | 0.78 (0.73-0.83) | 0.76 (0.71-0.80) |
| ≥ 3 times/week    | 6,710 (25.8)  | 6,076 (24.7)  | 0.80 (0.72-0.90) | 0.79 (0.73-0.84) | 0.66 (0.61-0.71) |
| Moderate PA       |               |               | <0.001*          | <0.001*          | 0.013*           |
| 0 time/week       | 10,034 (38.6) | 10,351 (42.1) | 1.00 (Ref)       | 1.00 (Ref)       | 1.00 (Ref)       |
| 1-2 times/week    | 8,573 (33.0)  | 7,346 (29.9)  | 0.83 (0.78-0.88) | 0.86 (0.81-0.90) | 0.93 (0.88-0.97) |
| ≥ 3 times/week    | 7,400 (28.5)  | 6,902 (28.1)  | 0.87 (0.79-0.96) | 0.88 (0.82-0.93) | 0.96 (0.90-1.02) |
| Strength Exercise |               |               | <0.001*          | <0.001*          | <0.001*          |
| 0 time/week       | 14,644 (56.3) | 13,115 (53.3) | 1.00 (Ref)       | 1.00 (Ref)       | 1.00 (Ref)       |
| 1-2 times/week    | 5,864 (22.5)  | 5,443 (22.1)  | 1.01 (0.93-1.10) | 1.06 (1.00-1.12) | 1.20 (1.13-1.28) |
| ≥ 3 times/week    | 5,499 (21.1)  | 6,041 (24.6)  | 1.19 (1.06-1.33) | 1.26 (1.18-1.34) | 1.55 (1.45-1.67) |

\* Multiple logistic regression analysis with complex sampling, Significance at  $P < 0.05$

† Adjusted for age, BMI, sedentary time for study or leisure, sex, economic level, sleep time, subjective health status, subjective body shape image, smoking, and drinking alcohol histories.

‡ Adjusted for partial model plus dietary habit and exercise pattern

**S3 Table** Odd ratios of dietary habit or exercise pattern in 2020 compared to 2019 in men.

| Dietary habit or PA | Number (%)    |               | OR (95% CI)      |         |                  |         |                  |         |
|---------------------|---------------|---------------|------------------|---------|------------------|---------|------------------|---------|
|                     | 2019          | 2020          | Crude            | P-value | Partial†         | P-value | Full‡            | P-value |
| Breakfast           |               |               |                  | <0.001* |                  | 0.006*  |                  | 0.001*  |
| 0-1 time/week       | 7,343 (26.4)  | 7,335 (27.1)  | 1.00 (Ref)       |         | 1.00 (Ref)       |         | 1.00 (Ref)       |         |
| 2-4 times/week      | 5,921 (21.3)  | 6,201 (22.9)  | 1.06 (1.01-1.12) |         | 1.09 (1.03-1.15) |         | 1.11 (1.05-1.17) |         |
| ≥ 5 times/week      | 14,512 (52.2) | 13,497 (49.9) | 0.94 (0.89-0.99) |         | 1.02 (0.97-1.07) |         | 1.03 (0.98-1.08) |         |
| Fruit               |               |               |                  | <0.001* |                  | 0.027*  |                  | 0.188   |
| 0-2 times/week      | 11,548 (41.6) | 12,012 (44.4) | 1.00 (Ref)       |         | 1.00 (Ref)       |         | 1.00 (Ref)       |         |
| 3-4 times/week      | 7,681 (27.7)  | 7,227 (26.7)  | 0.91 (0.86-0.95) |         | 0.94 (0.90-0.99) |         | 0.96 (0.91-1.01) |         |
| ≥ 5 times/week      | 8,547 (30.8)  | 7,794 (28.8)  | 0.88 (0.83-0.94) |         | 0.95 (0.90-1.00) |         | 0.97 (0.92-1.02) |         |
| Soda drink          |               |               |                  | <0.001* |                  | <0.001* |                  | <0.001* |
| 0-2 times/week      | 15,437 (55.6) | 15,616 (57.8) | 1.00 (Ref)       |         | 1.00 (Ref)       |         | 1.00 (Ref)       |         |
| 3-4 times/week      | 7,613 (27.4)  | 6,809 (25.2)  | 0.87 (0.84-0.91) |         | 0.84 (0.80-0.87) |         | 0.87 (0.83-0.91) |         |
| ≥ 5 times/week      | 4,726 (17.0)  | 4,608 (17.0)  | 0.94 (0.90-0.99) |         | 0.87 (0.83-0.92) |         | 0.89 (0.84-0.94) |         |
| Sweet drink         |               |               |                  | <0.001* |                  | <0.001* |                  | <0.001* |
| 0-2 times/week      | 13,060 (47.0) | 13,536 (50.1) | 1.00 (Ref)       |         | 1.00 (Ref)       |         | 1.00 (Ref)       |         |
| 3-4 times/week      | 8,358 (30.1)  | 7,312 (27.0)  | 0.83 (0.79-0.86) |         | 0.82 (0.79-0.86) |         | 0.87 (0.83-0.91) |         |
| ≥ 5 times/week      | 6,358 (22.9)  | 6,185 (22.9)  | 0.94 (0.90-0.99) |         | 0.91 (0.86-0.96) |         | 0.98 (0.93-1.05) |         |
| Fast food           |               |               |                  | 0.592   |                  | 0.009*  |                  | 0.130   |
| 0-2 times/week      | 20,447 (73.6) | 19,961 (73.8) | 1.00 (Ref)       |         | 1.00 (Ref)       |         | 1.00 (Ref)       |         |
| 3-4 times/week      | 5,709 (20.6)  | 5,549 (20.5)  | 1.00 (0.95-1.05) |         | 0.97 (0.93-1.02) |         | 1.03 (0.98-1.08) |         |
| ≥ 5 times/week      | 1,620 (5.8)   | 1,523 (5.6)   | 0.96 (0.89-1.04) |         | 0.88 (0.82-0.96) |         | 0.94 (0.86-1.02) |         |
| Vigorous PA         |               |               |                  | <0.001* |                  | <0.001* |                  | <0.001* |

|                   |               |               |                  |                  |                  |         |
|-------------------|---------------|---------------|------------------|------------------|------------------|---------|
| 0 time/week       | 5,010 (18.0)  | 7,137 (26.4)  | 1.00 (Ref)       | 1.00 (Ref)       | 1.00 (Ref)       |         |
| 1-2 times/week    | 9,965 (35.9)  | 9,324 (35.4)  | 0.65 (0.61-0.69) | 0.69 (0.65-0.73) | 0.65 (0.62-0.70) |         |
| ≥ 3 times/week    | 12,801 (46.1) | 10,572 (39.1) | 0.57 (0.54-0.61) | 0.62 (0.58-0.66) | 0.51 (0.48-0.55) |         |
| Moderate PA       |               |               |                  | <0.001*          | <0.001*          | 0.116   |
| 0 time/week       | 6,823 (24.6)  | 8,051 (29.8)  | 1.00 (Ref)       | 1.00 (Ref)       | 1.00 (Ref)       |         |
| 1-2 times/week    | 7,892 (28.4)  | 7,551 (27.9)  | 0.81 (0.77-0.85) | 0.85 (0.81-0.89) | 0.95 (0.90-1.00) |         |
| ≥ 3 times/week    | 13,061 (47.0) | 11,431 (42.3) | 0.73 (0.70-0.78) | 0.80 (0.76-0.84) | 0.95 (0.90-1.01) |         |
| Strength Exercise |               |               |                  | <0.001*          | <0.001*          | <0.001* |
| 0 time/week       | 9,928 (35.7)  | 9,139 (33.8)  | 1.00 (Ref)       | 1.00 (Ref)       | 1.00 (Ref)       |         |
| 1-2 times/week    | 8,496 (30.6)  | 7,618 (28.2)  | 0.95 (0.91-1.00) | 1.02 (0.97-1.08) | 1.20 (1.14-1.26) |         |
| ≥ 3 times/week    | 9,352 (33.7)  | 10,276 (38.0) | 1.15 (1.09-1.21) | 1.28 (1.21-1.35) | 1.68 (1.59-1.78) |         |

\* Multiple logistic regression analysis with complex sampling, Significance at  $P < 0.05$

† Adjusted for age, BMI, sedentary time for study or leisure, sex, economic level, sleep time, subjective health status, subjective body shape image, smoking, and drinking alcohol histories.

‡ Adjusted for partial model plus dietary habit and exercise pattern

**S4 Table** Odd ratios of dietary habit or exercise pattern in 2020 compared to 2019 in women.

| Dietary habit or PA | Number (%)    |               | OR (95% CI)      |         |                  |         |                  |         |
|---------------------|---------------|---------------|------------------|---------|------------------|---------|------------------|---------|
|                     | 2019          | 2020          | Crude            | P-value | Partial†         | P-value | Full‡            | P-value |
| Breakfast           |               |               |                  | <0.001* |                  | 0.194   |                  | 0.110   |
| 0-1 time/week       | 7,112 (27.7)  | 7,451 (29.7)  | 1.00 (Ref)       |         | 1.00 (Ref)       |         | 1.00 (Ref)       |         |
| 2-4 times/week      | 6,550 (25.5)  | 6,661 (26.5)  | 0.97 (0.93-1.02) |         | 1.01 (0.96-1.07) |         | 1.03 (0.98-1.09) |         |
| ≥ 5 times/week      | 12,023 (46.8) | 10,994 (43.8) | 0.88 (0.83-0.93) |         | 0.97 (0.91-1.02) |         | 0.98 (0.93-1.04) |         |
| Fruit               |               |               |                  | <0.001* |                  | <0.001* |                  | <0.001* |
| 0-2 times/week      | 10,516 (40.9) | 11,322 (45.1) | 1.00 (Ref)       |         | 1.00 (Ref)       |         | 1.00 (Ref)       |         |
| 3-4 times/week      | 7,125 (27.7)  | 6,695 (26.7)  | 0.89 (0.85-0.94) |         | 0.93 (0.89-0.98) |         | 0.95 (0.90-0.99) |         |
| ≥ 5 times/week      | 8,044 (31.3)  | 7,089 (28.2)  | 0.83 (0.78-0.88) |         | 0.87 (0.83-0.92) |         | 0.88 (0.84-0.93) |         |
| Soda drink          |               |               |                  | 0.164   |                  | <0.001* |                  | 0.460   |
| 0-2 times/week      | 18,491 (53.5) | 18,051 (58.5) | 1.00 (Ref)       |         | 1.00 (Ref)       |         | 1.00 (Ref)       |         |
| 3-4 times/week      | 4,920 (28.2)  | 4,673 (24.1)  | 0.98 (0.93-1.03) |         | 0.91 (0.86-0.95) |         | 0.97 (0.92-1.02) |         |
| ≥ 5 times/week      | 2,274 (18.3)  | 2,382 (17.4)  | 1.05 (0.98-1.13) |         | 0.92 (0.86-0.99) |         | 1.01 (0.94-1.09) |         |
| Sweet drink         |               |               |                  | <0.001* |                  | <0.001* |                  | <0.001* |
| 0-2 times/week      | 13,743 (53.5) | 14,693 (58.5) | 1.00 (Ref)       |         | 1.00 (Ref)       |         | 1.00 (Ref)       |         |
| 3-4 times/week      | 7,249 (28.2)  | 6,038 (24.1)  | 0.76 (0.73-0.80) |         | 0.75 (0.72-0.79) |         | 0.76 (0.73-0.80) |         |
| ≥ 5 times/week      | 4,693 (18.3)  | 4,375 (17.4)  | 0.84 (0.80-0.89) |         | 0.80 (0.75-0.84) |         | 0.81 (0.76-0.87) |         |
| Fast food           |               |               |                  | 0.180   |                  | <0.001* |                  | 0.005*  |
| 0-2 times/week      | 19,789 (77.0) | 19,302 (76.9) | 1.00 (Ref)       |         | 1.00 (Ref)       |         | 1.00 (Ref)       |         |
| 3-4 times/week      | 4,778 (18.6)  | 4,767 (19.0)  | 1.06 (0.96-1.16) |         | 0.96 (0.91-1.01) |         | 1.00 (0.95-1.06) |         |
| ≥ 5 times/week      | 1,118 (4.4)   | 1,037 (4.1)   | 1.09 (0.99-1.20) |         | 0.79 (0.71-0.87) |         | 0.85 (0.77-0.94) |         |
| Vigorous PA         |               |               |                  | <0.001* |                  | <0.001* |                  | <0.001* |

|                   |               |               |                  |        |                  |        |                  |
|-------------------|---------------|---------------|------------------|--------|------------------|--------|------------------|
| 0 time/week       | 11,809 (46.0) | 12,722 (50.7) | 1.00 (Ref)       |        | 1.00 (Ref)       |        | 1.00 (Ref)       |
| 1-2 times/week    | 9,158 (35.7)  | 8,087 (32.2)  | 0.81 (0.77-0.86) |        | 0.83 (0.78-0.87) |        | 0.79 (0.75-0.84) |
| ≥ 3 times/week    | 4,718 (18.4)  | 4,297 (17.1)  | 0.83 (0.77-0.89) |        | 0.83 (0.80-0.89) |        | 0.72 (0.67-0.78) |
| Moderate PA       |               |               |                  | 0.009* |                  | 0.080  | 0.154            |
| 0 time/week       | 11,824 (46.0) | 11,957 (47.6) | 1.00 (Ref)       |        | 1.00 (Ref)       |        | 1.00 (Ref)       |
| 1-2 times/week    | 8,318 (32.4)  | 7,766 (30.9)  | 0.92 (0.88-0.97) |        | 0.94 (0.89-0.99) |        | 1.01 (0.96-1.06) |
| ≥ 3 times/week    | 5,543 (21.6)  | 5,383 (21.4)  | 0.95 (0.88-1.01) |        | 0.96 (0.90-1.03) |        | 1.07 (1.00-1.15) |
| Strength Exercise |               |               |                  | 0.007* |                  | 0.002* | <0.001*          |
| 0 time/week       | 17,793 (693)  | 16,935 (67.5) | 1.00 (Ref)       |        | 1.00 (Ref)       |        | 1.00 (Ref)       |
| 1-2 times/week    | 5,416 (21.1)  | 5,506 (21.9)  | 1.07 (1.01-1.15) |        | 1.09 (1.02-1.16) |        | 1.18 (1.10-1.26) |
| ≥ 3 times/week    | 2,476 (9.6)   | 2,665 (10.6)  | 1.12 (1.04-1.21) |        | 1.13 (1.05-1.22) |        | 1.30 (1.19-1.42) |

\* Multiple logistic regression analysis with complex sampling, Significance at  $P < 0.05$

† Adjusted for age, BMI, sedentary time for study or leisure, sex, economic level, sleep time, subjective health status, subjective body shape image, smoking, and drinking alcohol histories.

‡ Adjusted for partial model plus dietary habit and exercise pattern
